# Supplementary material
Source: publisher figshare collection journal article supplement (https://gsapubs.figshare.com/ndownloader/files/28496505)
Supplement: Supplementary file 1 [file 28496505]

## Sheet: Table S1
TABLE S1. Microprobe data of phlogopite from the UG2 chromitite and adjacent silicate cumulates (Bushveld Complex, South Africa) from the Nkwe, Khuseleka, and Karee mines.
Depth (cm)	Rock type	wt%																		Ions per 12 (O, OH, F, Cl)															ΔDphlogopite-water (per mil)
		SiO2	TiO2	Al2O3	Cr2O3	V2O3	FeOT	MgO	MnO	CaO	Na2O	K2O	F	Cl	Total	H2O	O=F, Cl	TotalR		Si	Ti	Al	Cr	V	Fe	Mg	Mn	Ca	Na	K	F	Cl	OH	Mg#
Nkwe (phlogopite abundance: 0.05–0.42 vol.%; n=3)*
12	Anorthosite	36.612	3.13	14.947	0.033	0.231	12.529	17.199	0.06	0.084	0.076	9.545	0.319	0.257	94.83	3.79291	0.192315	98.4306		2.73792	0.176091	1.31734	0.0019511	0.0138498	0.783564	1.91736	0.00380038	0.00673044	0.0110191	0.910598	0.0754452	0.0325736	1.89198	70.989	-14.6985
12	Anorthosite	37.084	2.962	15.127	0.037	0.178	12.456	17.069	0.089	0.028	0.038	9.604	0.286	0.251	95.032	3.82809	0.177066	98.683		2.76081	0.165894	1.32724	0.00217782	0.0106244	0.775514	1.89436	0.00561202	0.00223344	0.00548493	0.912128	0.0673379	0.0316708	1.90099	70.9531	-14.4289
12	Anorthosite	36.508	3.057	15.207	-	0.208	12.551	17.017	0.105	0.076	0.077	9.611	0.15	0.249	94.707	3.87252	0.119349	98.4602		2.73188	0.172093	1.34111	-	0.0124788	0.785439	1.89828	0.0066549	0.00609331	0.0111712	0.917478	0.0354983	0.0315797	1.93292	70.7332	-14.7
12.5	Anorthosite	36.678	3.114	15.064	0.609	0.222	11.722	17.44	0.04	0.031	0.033	9.488	0.314	0.216	94.79	3.81986	0.180958	98.4289		2.7332	0.174574	1.32298	0.03588	0.0132634	0.730514	1.93738	0.00252467	0.00247511	0.00476778	0.901974	0.0740012	0.0272807	1.89872	72.6184	-13.6631
12.5	Anorthosite	37.018	3.105	15.156	0.703	0.238	11.828	17.499	0.038	0.034	0.045	9.587	0.161	0.205	95.503	3.92825	0.114052	99.3172		2.73606	0.172651	1.32021	0.0410806	0.0141034	0.731113	1.9281	0.00237889	0.00269251	0.00644855	0.903959	0.0376341	0.0256804	1.93669	72.5064	-13.731
12.5	Anorthosite	36.877	3.213	15.064	0.641	0.303	11.926	16.57	0.063	0.172	0.031	9.534	0.178	0.22	94.667	3.87662	0.124595	98.419		2.75262	0.180425	1.32519	0.0378284	0.0181329	0.744468	1.84381	0.00398299	0.0137558	0.00448631	0.90786	0.0420198	0.0278322	1.93015	71.2369	-14.3201
12.5	Anorthosite	36.576	3.207	14.83	0.618	0.283	11.884	16.754	0.083	0.134	0.027	9.597	0.375	0.217	94.378	3.76151	0.206869	97.9326		2.74551	0.181101	1.31194	0.0366762	0.0170313	0.746019	1.87477	0.00527695	0.010777	0.00392941	0.919	0.0890228	0.0276071	1.88337	71.5346	-14.3224
12.5	Anorthosite	37.289	4.953	14.813	1.016	0.35	9.245	18.133	0.065	0.099	-	9.661	0.218	0.148	95.878	3.97338	0.12519	99.7262		2.71746	0.271547	1.27225	0.058539	0.0204496	0.563443	1.96995	0.00401212	0.00773008	-	0.898168	0.0502437	0.0182801	1.93148	77.7593	-10.8581
12.5	Anorthosite	37.482	4.965	14.789	1.044	0.344	8.968	18.014	0.027	0.081	0.014	9.664	0.16	0.148	95.6	3.99897	0.100768	99.4982		2.73279	0.272331	1.27078	0.0601802	0.0201084	0.546815	1.95793	0.00166735	0.00632754	0.00197901	0.898864	0.0368933	0.0182886	1.94482	78.1688	-10.5676
12.5	Anorthosite	37.271	4.637	15.096	0.977	0.347	8.599	18.39	0.026	0.129	0.062	9.635	0.255	0.145	95.429	3.95147	0.140093	99.2404		2.71953	0.25454	1.29817	0.0563621	0.0202996	0.524726	2.00036	0.00160685	0.0100851	0.00877106	0.896869	0.0588447	0.0179319	1.92322	79.2195	-9.78916
12.5	Anorthosite	37.001	4.771	14.763	0.955	0.312	9.293	18.169	0.022	0.094	0.027	9.56	0.243	0.153	95.226	3.9315	0.136846	99.0207		2.71545	0.26341	1.27688	0.0554116	0.0183577	0.570355	1.98775	0.00136751	0.00739134	0.00384175	0.895035	0.0563999	0.0190307	1.92457	77.704	-10.8934
12.5	Anorthosite	36.579	5.049	14.784	1.125	0.359	7.879	18.826	0.022	0.146	0.047	9.62	0.183	0.147	94.656	3.95547	0.110227	98.5012		2.68843	0.279169	1.28058	0.0653715	0.0211542	0.484283	2.06266	0.00136952	0.011497	0.00669733	0.901977	0.0425365	0.0183113	1.93915	80.9857	-8.79316
35	Chromitite	38.723	4.161	15.574	1.569	0.334	2.687	22.947	-	0.134	1.211	7.939	0.306	0.086	95.523	4.09448	0.148254	99.4692		2.72457	0.220253	1.29145	0.0872812	0.0188413	0.158109	2.4069	-	0.0101018	0.1652	0.712603	0.0680916	0.0102556	1.92165	93.8359	-0.507354
37.5	Chromitite	38.859	4.152	15.118	1.302	0.28	2.587	22.958	-	0.023	1.017	8.146	0.285	0.281	94.826	4.02299	0.183414	98.6656		2.75476	0.221434	1.26309	0.0729748	0.0159142	0.153373	2.42622	-	0.00174698	0.139782	0.7367	0.0638971	0.0337625	1.90234	94.0544	-0.361858
37.5	Chromitite	37.579	4.379	15.245	1.54	0.34	2.928	22.814	-	0.027	1.128	8.101	0.224	0.277	94.432	4.01256	0.156826	98.2877		2.68969	0.235791	1.28597	0.0871459	0.0195106	0.175262	2.43423	-	0.00207056	0.156532	0.739689	0.0507047	0.0336025	1.91569	93.2837	-0.922494
37.5	Chromitite	38.073	4.398	15.684	1.365	0.312	2.999	22.478	0.044	0.107	1.146	8.055	0.344	0.307	95.098	3.98116	0.214125	98.865		2.70367	0.234956	1.31263	0.076637	0.0177634	0.178104	2.37957	0.00264648	0.00814118	0.157782	0.729719	0.0772572	0.0369496	1.88579	93.0365	-1.01449
37.5	Chromitite	37.9	4.163	15.534	1.337	0.321	3.086	22.987	-	0.027	1.067	8.07	0.335	0.272	94.91	3.98521	0.202437	98.6928		2.69721	0.222883	1.30289	0.0752275	0.0183154	0.183668	2.43872	-	0.00205876	0.147223	0.732661	0.0753988	0.032808	1.89179	92.9962	-1.10611
39	Chromitite	38.401	4.218	15.465	1.352	0.323	3.213	23.017	0.041	0.025	0.827	8.57	0.274	0.272	95.822	4.04797	0.176752	99.6932		2.71108	0.224028	1.28676	0.0754652	0.0182826	0.189702	2.42244	0.00245168	0.00189107	0.113199	0.771854	0.0611779	0.0325465	1.90628	92.7377	-1.27192
39	Chromitite	37.908	4.123	15.299	1.354	0.333	2.691	22.708	-	0.02	1.063	8.17	0.282	0.268	94.04	3.98055	0.179218	97.8413		2.71765	0.222367	1.29263	0.076745	0.01914	0.161338	2.42686	-	0.00153624	0.147752	0.747202	0.0639374	0.0325636	1.9035	93.7664	-0.574059
39	Chromitite	38.264	4.067	15.574	1.418	0.298	2.764	22.862	-	0.026	0.972	8.316	0.202	0.256	94.88	4.06114	0.142824	98.7983		2.71743	0.217289	1.30352	0.0796185	0.0169676	0.16416	2.4204	-	0.00197838	0.133836	0.753419	0.0453695	0.0308137	1.92382	93.6484	-0.60812
39	Chromitite	37.485	4.288	15.261	1.474	0.338	2.833	22.303	0.032	0.1	1.141	7.897	0.228	0.26	93.485	3.98128	0.154675	97.3116		2.70472	0.232764	1.29776	0.0840877	0.0195532	0.170952	2.39901	0.00195566	0.00773094	0.15962	0.726911	0.0520288	0.0317961	1.91618	93.3481	-0.871331
40	Chromitite	38.678	4.579	15.327	1.531	0.364	2.956	22.786	-	0.036	1.18	8.152	0.213	0.28	95.929	4.09144	0.152872	99.8676		2.72002	0.242256	1.27032	0.0851243	0.0205232	0.17385	2.3888	-	0.00271255	0.16089	0.731352	0.0473731	0.0333735	1.91925	93.216	-0.965782
40	Chromitite	38.624	4.563	15.147	0.653	0.35	1.504	22.892	-	0.057	1.014	8.165	0.196	0.287	93.316	4.02454	0.147293	97.1933		2.76366	0.245625	1.27733	0.0369411	0.0200785	0.0899987	2.44183	-	0.00436988	0.14067	0.745311	0.0443534	0.0348052	1.92084	96.4453	1.23278
40	Chromitite	37.981	4.507	15.379	1.615	0.347	2.945	22.47	-	0.12	1.013	7.9	0.209	0.286	94.624	4.03621	0.152541	98.5077		2.7063	0.241598	1.29147	0.0909812	0.0198232	0.175492	2.3868	-	0.00916132	0.139945	0.71811	0.0470977	0.0345391	1.91836	93.151	-1.01642
42	Chromitite	38.757	4.548	15.338	1.404	0.337	2.76	22.391	-	0.068	0.671	8.78	0.157	0.101	95.231	4.14012	0.0888993	99.2822		2.74059	0.241941	1.27823	0.078493	0.0191055	0.163217	2.36032	-	0.00515193	0.0919928	0.792032	0.0351106	0.0121046	1.95278	93.5322	-0.68832
42	Chromitite	38.574	4.767	15.33	1.333	0.343	2.819	22.521	-	0.091	0.708	8.501	0.243	0.091	95.198	4.10165	0.122855	99.1768		2.72781	0.253606	1.27764	0.0745278	0.0194468	0.166715	2.37416	-	0.00689488	0.0970709	0.766907	0.0543461	0.0109068	1.93475	93.4387	-0.801476
42	Chromitite	37.77	4.582	15.329	1.436	0.345	2.809	21.888	0.056	0.102	0.999	7.976	0.159	0.136	93.489	4.05619	0.0976394	97.4476		2.71829	0.248084	1.3002	0.0817096	0.0199069	0.169068	2.34833	0.00341363	0.00786531	0.139396	0.732298	0.0361901	0.0165891	1.94722	93.284	-0.847174
42	Chromitite	38.274	4.71	15.563	1.569	0.329	2.938	22.034	-	0.102	1.073	8.113	0.151	0.125	94.898	4.12268	0.0917886	98.9289		2.71552	0.2514	1.30134	0.0880119	0.0187146	0.174326	2.33048	-	0.00775383	0.1476	0.734318	0.0338821	0.0150312	1.95109	93.0403	-1.00832
44.5	Chromitite	39.1	4.528	15.435	1.292	0.338	2.811	22.991	0.024	0.031	1.009	8.168	0.251	0.238	96.056	4.10283	0.159395	99.9994		2.73767	0.23851	1.27368	0.0715215	0.0189739	0.164599	2.39975	0.00142329	0.00232559	0.136972	0.729582	0.0555805	0.0282434	1.91618	93.5813	-0.687486
44.5	Chromitite	38.575	4.59	15.849	1.363	0.333	2.935	22.478	-	0.08	1.072	8.253	0.148	0.237	95.817	4.13436	0.115799	99.8356		2.71203	0.242771	1.31322	0.0757625	0.0187702	0.172567	2.35586	-	0.00602623	0.146124	0.74021	0.0329075	0.0282405	1.93885	93.1749	-0.889535
44.5	Chromitite	38.669	4.625	15.773	1.444	0.337	2.871	22.962	-	0.02	1.022	8.245	0.251	0.225	96.287	4.10878	0.156461	100.239		2.70582	0.243469	1.30076	0.0798865	0.0189061	0.168008	2.39524	-	0.00149945	0.138651	0.736005	0.0555462	0.0266842	1.91777	93.4455	-0.79278
44.5	Chromitite	38.611	4.48	15.745	1.456	0.329	2.882	22.691	-	0.095	1.118	8.13	0.276	0.232	95.877	4.07678	0.168568	99.7852		2.7134	0.236851	1.30404	0.0808971	0.0185367	0.169378	2.37716	-	0.00715307	0.152328	0.728864	0.0613416	0.0276328	1.91103	93.3487	-0.811101
47	Chromitite	38.837	4.316	15.438	1.456	0.299	3.046	23.059	-	-	0.26	9.282	0.313	0.346	96.455	4.03369	0.209872	100.279		2.72709	0.227998	1.27759	0.0808322	0.0168329	0.178873	2.41378	-	-	0.0353968	0.831475	0.0695091	0.041178	1.88931	93.1008	-1.02077
49	Chromitite	38.259	4.564	15.275	1.363	0.367	2.914	23.006	-	0.013	1.041	8.206	0.229	0.293	95.387	4.05427	0.162542	99.2787		2.70725	0.24296	1.27386	0.0762534	0.0208207	0.172443	2.42683	-	0.000985608	0.142818	0.740763	0.0512476	0.0351396	1.91361	93.3657	-0.869971
49	Chromitite	38.109	4.484	15.098	1.44	0.318	3.184	22.619	0.052	0.062	0.733	8.604	0.218	0.317	95.074	4.02569	0.163326	98.9364		2.71438	0.240272	1.26739	0.0810913	0.0181595	0.18966	2.4017	0.00313707	0.00473152	0.101224	0.781802	0.0491069	0.0382681	1.91262	92.6811	-1.30816
49	Chromitite	38.605	4.488	15.419	1.403	0.346	2.926	22.604	-	0.011	0.884	8.476	0.365	0.302	95.61	3.99485	0.221839	99.383		2.727	0.238501	1.28365	0.0783554	0.0195953	0.172853	2.38029	-	0.000832533	0.121068	0.763812	0.0815414	0.0361563	1.8823	93.2298	-0.914046
49	Chromitite	38.391	4.551	15.291	1.44	0.337	2.89	22.843	-	0.048	0.929	8.402	0.202	0.283	95.475	4.07281	0.148917	99.3989		2.71454	0.242086	1.27424	0.0805005	0.0191043	0.170894	2.40782	-	0.00363643	0.127356	0.757885	0.0451712	0.0339148	1.92091	93.3729	-0.865376
50	Chromitite	39.107	4.581	15.428	1.31	0.342	2.805	23.149	-	0.033	0.95	8.116	0.284	0.346	96.268	4.06634	0.197661	100.137		2.73395	0.24093	1.27114	0.0724063	0.0191689	0.163995	2.41252	-	0.00247182	0.128765	0.723822	0.0627911	0.0409965	1.89621	93.635	-0.677766
50	Chromitite	39.349	4.718	15.6	1.332	0.356	2.711	22.976	-	0.053	1.03	8.182	0.467	0.319	96.824	4.00903	0.268624	100.564		2.73645	0.246835	1.27857	0.0732365	0.019849	0.157668	2.38194	-	0.00394908	0.138876	0.725884	0.10271	0.0375993	1.85969	93.7916	-0.538733
54	Chromitite	39.265	4.725	15.649	1.267	0.342	2.823	22.861	0.023	0.068	1.131	8.062	0.401	0.15	96.564	4.07821	0.202698	100.44		2.73382	0.247492	1.2841	0.0697445	0.0190908	0.164375	2.37281	0.00135635	0.0050727	0.152673	0.716078	0.0882982	0.0177007	1.894	93.5214	-0.699234
54	Chromitite	39.227	4.642	15.594	1.314	0.342	2.948	22.862	-	0.134	1.016	8.005	0.433	0.145	96.453	4.05809	0.215044	100.296		2.73512	0.243495	1.28143	0.0724361	0.0191184	0.171901	2.37634	-	0.0100106	0.137348	0.712042	0.0954821	0.0171354	1.88738	93.2541	-0.874836
54	Chromitite	38.573	4.838	15.334	1.334	0.355	2.898	22.764	-	0.05	1.035	8.068	0.479	0.126	95.64	3.99629	0.230125	99.4062		2.71784	0.256449	1.27334	0.0743132	0.0200541	0.170765	2.39107	-	0.00377466	0.14139	0.725204	0.106738	0.0150469	1.87821	93.3343	-0.89011
54	Chromitite	38.27	4.815	15.469	1.597	0.362	3.132	22.625	0.023	0.034	1.081	8.01	0.349	0.123	95.715	4.05606	0.174709	99.5963		2.69816	0.255388	1.28534	0.0890193	0.0204623	0.184668	2.37795	0.00137346	0.00256836	0.147765	0.720437	0.0778178	0.0146977	1.90748	92.7937	-1.23604
55.5	Chromitite	38.485	4.527	15.265	1.286	0.323	2.929	22.958	-	0.041	1.085	8.081	0.428	0.201	95.4	3.98781	0.225575	99.1622		2.72034	0.240734	1.27167	0.071869	0.018305	0.173146	2.41918	-	0.00310514	0.148696	0.728702	0.0956794	0.0240803	1.88024	93.3208	-0.898695
55.5	Chromitite	38.844	4.493	15.414	1.274	0.346	2.612	23.057	-	0.019	1.048	8.122	0.434	0.193	95.637	4.00843	0.226296	99.4191		2.73191	0.237725	1.27763	0.0708405	0.0195099	0.15363	2.4174	-	0.00143174	0.142903	0.728718	0.0965331	0.0230057	1.88046	94.0246	-0.411976
55.5	Chromitite	38.884	4.81	15.477	1.454	0.326	2.85	22.797	0.028	0.071	1.169	8.005	0.355	0.167	96.206	4.07388	0.187165	100.093		2.72108	0.253227	1.27645	0.0804459	0.0182904	0.166792	2.37821	0.00165961	0.00532347	0.158607	0.714636	0.0785673	0.0198071	1.90163	93.4463	-0.828318
55.5	Chromitite	38.966	4.542	15.327	1.363	0.295	2.804	23.202	0.032	0.102	1.083	7.872	0.432	0.183	95.98	4.02742	0.223198	99.7842		2.73057	0.239447	1.26582	0.0755148	0.0165739	0.164326	2.42379	0.00189931	0.00765833	0.147141	0.703729	0.0957402	0.0217347	1.88253	93.6508	-0.701623
55.5	Chromitite	39.242	4.622	15.402	1.468	0.36	2.73	23.106	-	0.02	1.011	8.061	0.456	0.185	96.444	4.036	0.233755	100.246		2.73681	0.242504	1.26596	0.0809448	0.0201294	0.159227	2.40227	-	0.00149448	0.136704	0.717193	0.100578	0.0218676	1.87755	93.7838	-0.591626
58	Chromitite	39.129	4.759	15.046	1.143	0.343	2.633	23.195	-	0.035	1.03	8.207	0.523	0.165	95.961	3.98533	0.257453	99.6889		2.74424	0.251093	1.24363	0.0633782	0.0192865	0.154431	2.42506	-	0.00263002	0.140055	0.734281	0.116003	0.019613	1.86438	94.0131	-0.455655
58	Chromitite	39.089	4.564	15.478	1.512	0.331	2.914	22.897	-	0.037	1.072	8.002	0.396	0.151	96.249	4.0631	0.200818	100.111		2.73249	0.240018	1.27516	0.0835651	0.018551	0.170355	2.38608	-	0.00277123	0.14529	0.713602	0.0875472	0.0178902	1.89456	93.3362	-0.858208
58	Chromitite	39.18	4.649	15.372	1.321	0.326	2.857	22.997	0.038	0.016	1.043	8.268	0.535	0.18	96.516	3.99356	0.265891	100.244		2.73647	0.244276	1.26533	0.0729455	0.0182549	0.166878	2.39442	0.00224796	0.00119733	0.141237	0.736683	0.118175	0.0213076	1.86052	93.4847	-0.786698
58	Chromitite	38.814	4.452	15.294	1.369	0.313	2.988	23.037	-	0.066	1.122	8.254	0.482	0.17	96.12	3.9976	0.241318	99.8763		2.72591	0.23522	1.26588	0.0760144	0.0176239	0.175495	2.41186	-	0.00496631	0.152775	0.739506	0.107057	0.0202352	1.87271	93.2172	-0.965021
58	Chromitite	39.006	4.568	15.305	1.379	0.328	2.739	22.717	0.028	0.048	1.068	8.02	0.485	0.287	95.709	3.95897	0.268982	99.399		2.74421	0.241772	1.26901	0.0767042	0.018501	0.161153	2.38254	0.00166848	0.00361821	0.145678	0.719803	0.107912	0.0342218	1.85787	93.6646	-0.626711
62	Chromitite	40.153	4.441	15.566	1.337	0.303	2.883	23.218	0.023	0.019	1.063	8.308	0.588	0.177	97.791	4.03335	0.287531	101.537		2.76313	0.229911	1.26243	0.0727419	0.0167171	0.165916	2.38184	0.00134057	0.00140089	0.141825	0.729346	0.127969	0.0206439	1.85139	93.4877	-0.690877
62	Chromitite	40.005	4.434	15.559	1.206	0.302	2.579	23.603	-	0.019	0.895	8.248	0.56	0.186	97.318	4.03408	0.277772	101.074		2.75944	0.23009	1.26484	0.0657694	0.0167013	0.148772	2.42705	-	0.0014042	0.119693	0.725788	0.122163	0.0217448	1.85609	94.2243	-0.229912
62	Chromitite	39.586	4.402	15.567	1.246	0.285	2.836	22.981	-	0.054	1.101	8.262	0.517	0.167	96.761	4.02386	0.255378	100.529		2.75299	0.230307	1.2759	0.0685094	0.0158907	0.164942	2.38251	-	0.00402368	0.148452	0.732996	0.11371	0.0196841	1.86661	93.5252	-0.65416
62	Chromitite	39.829	4.524	15.576	1.318	0.327	3.087	22.979	-	0.07	1.046	8.187	0.543	0.185	97.4	4.0324	0.270388	101.162		2.75364	0.235302	1.26914	0.0720431	0.0181255	0.178487	2.36833	-	0.00518528	0.140209	0.722082	0.118727	0.0216778	1.85959	92.9918	-1.01632
63.5	Chromitite	39.547	4.731	15.355	1.393	0.309	2.853	22.95	-	0.014	1.154	8.102	0.611	0.173	96.907	3.98099	0.296313	100.592		2.74822	0.247335	1.25758	0.0765348	0.017216	0.165806	2.37752	-	0.0010424	0.155482	0.718264	0.134284	0.020376	1.84534	93.4807	-0.773216
63.5	Chromitite	39.759	4.614	15.303	1.304	0.316	2.926	22.983	-	0.018	1.125	8.216	0.599	0.22	97.081	3.98043	0.301866	100.76		2.75932	0.240901	1.25167	0.0715505	0.0175828	0.169825	2.3778	-	0.00133846	0.151375	0.727411	0.131473	0.0258776	1.84265	93.334	-0.846192
63.5	Chromitite	39.763	4.578	15.413	1.493	0.33	2.84	23.041	0.023	0.036	1.076	8.26	0.487	0.202	97.291	4.04964	0.250644	101.09		2.75225	0.238385	1.25731	0.0817029	0.0183129	0.164395	2.37746	0.00134839	0.00266979	0.144397	0.72936	0.106606	0.0236971	1.8697	93.5325	-0.725264
65	Chromitite	39.301	4.568	15.168	1.315	0.301	2.849	22.727	0.022	0.015	1.071	8.23	0.643	0.131	96.04	3.93576	0.300309	99.6755		2.75715	0.24109	1.2541	0.0729377	0.0169301	0.167152	2.37686	0.00130725	0.0011275	0.145675	0.736564	0.142663	0.0155763	1.84176	93.4296	-0.784148
65	Chromitite	39.629	4.578	15.299	1.266	0.298	2.871	22.955	-	0.009	1.022	8.278	0.575	0.135	96.661	3.99894	0.272579	100.387		2.75953	0.239824	1.25554	0.0696987	0.0166369	0.167192	2.38288	-	0.000671477	0.137978	0.735361	0.126629	0.0159328	1.85744	93.4436	-0.760199
65	Chromitite	39.395	4.577	15.625	1.533	0.302	2.692	23.296	0.038	0.013	1.077	8.344	0.584	0.138	97.337	4.01854	0.277046	101.078		2.72763	0.238408	1.27501	0.0839182	0.0167643	0.155877	2.40453	0.00222847	0.000964395	0.144576	0.737009	0.12788	0.0161942	1.85593	93.912	-0.510151
65	Chromitite	39.59	4.616	15.442	1.338	0.334	3.106	22.953	-	0.072	1.121	8.18	0.55	0.144	97.182	4.02595	0.264083	100.944		2.74569	0.240839	1.26217	0.0733654	0.0185715	0.180148	2.37306	-	0.00535014	0.150733	0.723724	0.120635	0.0169264	1.86244	92.9443	-1.10745
77.5	Pyroxenite	38.728	5.131	14.319	1.414	0.41	8.1	18.565	0.027	0.026	0.138	9.327	0.092	0.35	96.509	4.04451	0.117718	100.436		2.77995	0.277082	1.21136	0.0802473	0.0235956	0.486248	1.9866	0.00164155	0.00199964	0.0192056	0.854097	0.0208854	0.0425809	1.93653	80.3365	-9.20867
77.5	Pyroxenite	39.038	5.519	14.245	1.517	0.43	7.954	18.691	0.044	0.066	0.159	9.168	0.178	0.34	97.197	4.04065	0.151674	101.086		2.77933	0.295602	1.19526	0.0853901	0.0245446	0.473586	1.98376	0.00265328	0.00503458	0.0219476	0.832685	0.0400789	0.0410267	1.91889	80.7277	-8.9583
77.5	Pyroxenite	38.877	5.613	14.275	1.712	0.42	7.83	18.572	0.029	-	0.124	9.373	0.123	0.339	97.158	4.06219	0.128289	101.092		2.77102	0.30098	1.19914	0.0964763	0.0240011	0.466735	1.97337	0.00175075	-	0.0171359	0.852275	0.0277266	0.0409527	1.93132	80.8724	-8.86571
77.5	Pyroxenite	38.953	5.485	14.468	1.612	0.417	8.065	18.568	0.05	0.01	0.087	9.425	0.165	0.362	97.516	4.04719	0.151164	101.412		2.76936	0.293366	1.21225	0.0906092	0.0237689	0.479516	1.96792	0.00301083	0.000761736	0.0119921	0.854817	0.0370993	0.0436196	1.91928	80.4074	-9.16332
77.5	Pyroxenite	39.237	5.253	14.33	1.397	0.395	8.067	18.76	0.031	0.01	0.097	9.44	0.073	0.374	97.349	4.08734	0.115133	101.321		2.78982	0.280985	1.20081	0.078532	0.0225171	0.479683	1.98846	0.0018669	0.000761812	0.0133718	0.856262	0.0164153	0.04507	1.93851	80.565	-9.06241
80	Pyroxenite	39.328	4.472	14.643	1.463	0.364	7.848	19.23	0.033	0.064	0.11	9.169	0.144	0.371	97.094	4.05493	0.144352	101.005		2.79597	0.239181	1.2269	0.0822326	0.0207476	0.466606	2.03804	0.00198712	0.00487503	0.0151621	0.831584	0.032377	0.0447033	1.92292	81.3704	-8.38484
80	Pyroxenite	39.176	3.938	14.913	1.421	0.293	8.466	19.379	-	0.042	0.132	9.132	0.144	0.324	97.239	4.06499	0.133747	101.17		2.78641	0.210715	1.25008	0.0799076	0.0167081	0.503575	2.05475	-	0.00320067	0.0182027	0.828599	0.0323915	0.0390576	1.92855	80.3162	-8.96013
80	Pyroxenite	39.708	4.409	14.733	1.273	0.343	7.841	19.608	-	0.038	0.126	9.289	-	0.324	97.668	4.14276	0.0950082	101.716		2.80155	0.234022	1.22507	0.0710098	0.0194021	0.462651	2.06233	-	0.00287257	0.0172357	0.836071	-	0.0387437	1.94965	81.677	-8.16582
80	Pyroxenite	39.579	4.356	14.651	1.612	0.322	7.877	19.514	-	0.031	0.13	9.067	0.206	0.298	97.496	4.06623	0.153986	101.408		2.79912	0.23176	1.22116	0.0901344	0.0182577	0.465884	2.05734	-	0.00234901	0.0178253	0.818038	0.0460752	0.0357197	1.91821	81.5361	-8.2989
82	Pyroxenite	38.937	5.488	14.171	1.559	0.415	8.041	18.292	-	0.014	0.129	9.368	0.239	0.347	96.837	3.98676	0.178938	100.645		2.78749	0.295569	1.19563	0.08824	0.0238195	0.481417	1.95216	-	0.00107385	0.0179051	0.855561	0.0541118	0.0421032	1.90379	80.2177	-9.28471
82	Pyroxenite	39.11	5.252	14.385	1.527	0.387	7.823	18.602	-	-	0.139	9.275	0.151	0.325	96.839	4.04768	0.13692	100.75		2.7908	0.281943	1.20976	0.0861489	0.0221405	0.466848	1.97881	-	-	0.0192306	0.844324	0.034077	0.0393061	1.92662	80.9112	-8.83672
82	Pyroxenite	39.318	5.251	14.29	1.527	0.409	7.969	18.526	-	-	0.097	9.229	0.235	0.356	97.038	4.00598	0.179285	100.865		2.80164	0.281487	1.20005	0.086026	0.0233657	0.474883	1.96792	-	-	0.0134008	0.838938	0.0529582	0.0429939	1.90405	80.5599	-9.0529
82	Pyroxenite	39.01	5.418	14.342	1.597	0.416	8.307	18.562	0.034	0.129	0.147	8.991	-	0.295	97.204	4.12014	0.0829902	101.241		2.77592	0.290044	1.20278	0.0898473	0.0237333	0.494351	1.96906	0.00204922	0.00983529	0.0202808	0.816192	-	0.0355785	1.95564	79.9322	-9.46741
Khuseleka (phlogopite abundance 0.11–0.17 vol.%, n=3)*
4	Pyroxenite	40.057	5.233	14.887	1.378	0.369	4.711	20.778	-	0.054	0.079	9.625	0.594	0.157	97.651	3.97384	0.285544	101.339		2.79615	0.274807	1.22472	0.0760503	0.0206511	0.275015	2.16217	-	0.00403871	0.0106917	0.85711	0.131133	0.0185745	1.85029	88.7159	-3.73361
4	Pyroxenite	39.918	5.212	14.667	1.481	0.373	4.798	20.626	0.021	0.044	0.065	9.611	0.528	0.162	97.247	3.98335	0.258882	100.971		2.79982	0.275018	1.21241	0.082127	0.0209752	0.281438	2.15665	0.00124755	0.0033066	0.00883918	0.859971	0.117122	0.019258	1.86362	88.4566	-3.94496
6	Pyroxenite	39.954	4.979	13.871	1.277	0.358	6.25	20.362	0.021	0.012	0.059	9.298	0.434	0.437	97.03	3.92084	0.281356	100.669		2.82695	0.26503	1.15668	0.0714361	0.0203084	0.369827	2.14774	0.00125851	0.000909715	0.00809369	0.839268	0.097116	0.0524052	1.85048	85.3101	-6.02555
6	Pyroxenite	40.252	5.468	13.431	1.441	0.399	5.64	20.644	-	-	0.087	9.244	0.42	0.4	97.165	3.95532	0.267112	100.853		2.83569	0.289798	1.11514	0.0802611	0.0225361	0.332286	2.16805	-	-	0.0118831	0.830779	0.0935761	0.0477603	1.85866	86.7103	-5.12942
6	Pyroxenite	39.948	5.621	14.05	1.419	0.401	5.795	20.262	0.054	0.02	0.085	9.41	0.371	0.443	97.623	3.97901	0.256183	101.346		2.80677	0.297112	1.16342	0.0788249	0.0225887	0.340507	2.12225	0.00321354	0.0015056	0.0115789	0.843442	0.0824384	0.0527534	1.86481	86.1738	-5.47282
26.5	Pyroxenite	40.472	3.403	14.272	0.8	0.312	7.821	20.111	-	-	0.111	9.432	0.338	0.473	97.307	3.95197	0.249057	101.01		2.86714	0.181364	1.19159	0.0448079	0.0177208	0.46336	2.12389	-	-	0.015246	0.852417	0.0757278	0.0567925	1.86748	82.0906	-7.69841
26.5	Pyroxenite	40.342	3.52	14.458	0.498	0.284	7.733	20.397	0.052	0.009	0.09	9.335	0.336	0.338	97.175	3.99177	0.217751	100.949		2.85486	0.187398	1.20582	0.0278629	0.0161132	0.457654	2.15178	0.00311681	0.000682397	0.0123483	0.842745	0.0751988	0.0405396	1.88426	82.4616	-7.45716
26.5	Pyroxenite	40.343	3.165	14.494	0.483	0.293	7.758	20.688	0.031	-	0.116	9.225	0.319	0.321	97.036	4.00179	0.206757	100.831		2.85653	0.168593	1.2095	0.0270388	0.0166331	0.45939	2.1837	0.00185913	-	0.0159245	0.833279	0.0714339	0.0385222	1.89004	82.6192	-7.3304
26.5	Pyroxenite	40.146	2.788	14.54	0.586	0.261	7.482	20.925	0.048	0.023	0.08	9.488	0.307	0.376	96.836	3.97965	0.214115	100.602		2.85191	0.148998	1.21732	0.0329125	0.0148651	0.444501	2.21596	0.00288811	0.0017506	0.0110184	0.859848	0.0689724	0.0452706	1.88576	83.2924	-6.89355
26.5	Pyroxenite	40.076	3.027	14.379	0.937	0.285	7.787	20.347	-	0.023	0.089	9.258	0.293	0.364	96.674	3.97862	0.205512	100.447		2.85419	0.162183	1.20691	0.0527603	0.0162734	0.463798	2.16024	-	0.00175506	0.0122892	0.841141	0.0659947	0.0439374	1.89007	82.325	-7.54214
26.5	Pyroxenite	38.86	5.401	14.463	1.224	0.426	8.314	18.327	0.029	0.031	0.165	9.287	0.136	0.295	96.834	4.05263	0.123834	100.763		2.77944	0.290619	1.21916	0.0692157	0.0244286	0.497308	1.95411	0.00175683	0.00237565	0.022881	0.84739	0.0307636	0.0357611	1.93348	79.7135	-9.6183
26.5	Pyroxenite	39.044	5.254	14.495	0.985	0.413	8.168	18.723	0.057	0.024	0.162	9.287	0.396	0.322	97.09	3.93302	0.239405	100.784		2.78561	0.282001	1.2188	0.0555612	0.0236239	0.487352	1.99134	0.00344445	0.00183461	0.0224088	0.845269	0.0893521	0.0389365	1.87171	80.3383	-9.17454
26.5	Pyroxenite	39.725	5.259	14.134	0.943	0.413	8.267	19.008	0.045	0.02	0.121	9.23	0.2	0.283	97.5	4.0658	0.148075	101.418		2.81414	0.280272	1.18003	0.0528157	0.0234567	0.489769	2.00734	0.00270006	0.00151803	0.016619	0.834137	0.044808	0.0339785	1.92121	80.3866	-9.17661
26.5	Pyroxenite	39.52	4.885	14.263	1.054	0.402	8.017	19.222	0.033	0.021	0.176	9.245	0.234	0.314	97.216	4.0292	0.169386	101.076		2.80798	0.261118	1.19436	0.059209	0.0229002	0.476377	2.03601	0.00198596	0.00159869	0.0242453	0.837989	0.052582	0.0378131	1.9096	81.0389	-8.74224
35	Pyroxenite	39.241	4.453	14.928	1.194	0.349	8.438	19.018	0.029	0.009	0.148	9.369	0.191	0.357	97.563	4.04284	0.160984	101.445		2.7854	0.237791	1.24881	0.0670071	0.0198613	0.500896	2.01241	0.00174351	0.000684473	0.0203679	0.848387	0.042877	0.0429488	1.91417	80.0702	-9.12728
35	Pyroxenite	40.518	2.885	14.77	1.017	0.25	7.591	20.767	0.023	0.056	0.057	9.548	0.216	0.422	97.934	4.05691	0.186178	101.805		2.84744	0.152527	1.2233	0.0565063	0.0140858	0.446135	2.17562	0.00136903	0.00421659	0.00776637	0.855997	0.0480069	0.0502637	1.90173	82.9834	-7.0709
43	Chromitite	40.218	4.294	15.369	1.72	0.274	2.771	23.06	-	0.065	0.769	8.495	0.447	0.187	97.452	4.08474	0.230416	101.306		2.77584	0.222962	1.25016	0.0938581	0.0151621	0.159945	2.37267	-	0.00480678	0.102905	0.747982	0.097572	0.0218751	1.88055	93.6846	-0.563855
43	Chromitite	40.13	4.607	15.401	1.4	0.309	2.751	22.796	-	-	0.775	8.683	0.525	0.159	97.296	4.0457	0.256941	101.085		2.77563	0.23972	1.25542	0.0765578	0.017135	0.159127	2.35047	-	-	0.103927	0.766153	0.11484	0.0186391	1.86652	93.6593	-0.559217
43	Chromitite	39.896	4.185	15.584	1.341	0.316	2.898	22.528	-	0.052	0.698	8.624	0.43	0.17	96.504	4.05557	0.219422	100.34		2.78021	0.219401	1.27989	0.0738832	0.0176551	0.168891	2.34031	-	0.00388256	0.0943062	0.766673	0.0947676	0.0200785	1.88515	93.2691	-0.690672
44	Chromitite	38.977	4.411	14.973	1.58	0.295	3.14	22.266	0.022	-	0.573	8.873	0.585	0.298	95.686	3.88136	0.313572	99.2538		2.75991	0.234973	1.24952	0.0884531	0.0167473	0.185942	2.35035	0.00131944	-	0.0786644	0.801513	0.131004	0.0357633	1.83323	92.6687	-1.27644
44	Chromitite	38.644	4.796	14.884	1.531	0.332	3.049	21.847	0.022	0.022	0.607	8.761	0.352	0.278	94.914	3.97021	0.210949	98.6733		2.7537	0.257104	1.24998	0.0862539	0.0189674	0.181699	2.32076	0.00132781	0.00167967	0.083861	0.796419	0.0793269	0.0335749	1.8871	92.7392	-1.25536
44	Chromitite	39.819	4.57	15.33	1.605	0.315	2.964	22.749	-	0.045	0.554	8.83	0.448	0.272	97.251	4.039	0.250018	101.04		2.76335	0.238593	1.25382	0.0880624	0.0175264	0.172023	2.35349	-	0.003346	0.0745406	0.781737	0.0983259	0.0319927	1.86968	93.1886	-0.91336
46.5	Chromitite	39.733	4.331	15.686	1.509	0.288	3.138	22.614	-	0.053	0.973	8.237	0.412	0.207	96.979	4.07116	0.220192	100.83		2.7583	0.22619	1.28336	0.0828226	0.0160294	0.182181	2.3403	-	0.00394215	0.13096	0.729479	0.0904547	0.0243554	1.88519	92.7777	-1.07373
46.5	Chromitite	40.024	4.383	15.735	1.321	0.304	3.096	22.821	-	0.09	0.713	8.637	0.334	0.205	97.476	4.13165	0.186897	101.421		2.76378	0.227693	1.28055	0.0721199	0.0168303	0.178791	2.3492	-	0.00665874	0.0954573	0.76085	0.0729412	0.0239923	1.90307	92.9276	-0.968988
46.5	Chromitite	39.798	4.508	15.569	1.387	0.331	3.281	22.202	0.034	0.029	0.55	9.112	0.321	0.202	97.143	4.10843	0.180746	101.071		2.76739	0.235824	1.2759	0.0762527	0.0184532	0.190799	2.30147	0.00200247	0.0021606	0.0741496	0.808308	0.0705924	0.0238065	1.9056	92.3443	-1.33755
46.5	Chromitite	39.811	4.416	15.382	1.392	0.315	3.062	22.758	-	0.047	0.466	9.056	0.355	0.2	97.075	4.09473	0.194611	100.975		2.76706	0.230909	1.26002	0.0764936	0.0175534	0.177985	2.35805	-	0.0035001	0.062797	0.802983	0.0780348	0.0235603	1.8984	92.9818	-1.00484
46.5	Chromitite	39.513	4.195	15.499	1.49	0.297	3.396	22.63	-	0.047	0.424	9.178	0.339	0.203	97.022	4.08768	0.188551	100.921		2.75522	0.220061	1.2737	0.0821431	0.0166038	0.198036	2.35236	-	0.0035114	0.0573216	0.816427	0.0747582	0.0239909	1.90125	92.2351	-1.47062
52	Chromitite	40.043	4.65	15.861	1.348	0.342	2.799	22.88	0.023	0.065	0.892	8.266	0.388	0.087	97.461	4.14992	0.183007	101.428		2.75628	0.240793	1.28669	0.0733594	0.0188737	0.161124	2.34777	0.00134092	0.00479376	0.119041	0.725847	0.084464	0.0101496	1.90539	93.5779	-0.563952
52	Chromitite	39.78	4.835	15.647	1.485	0.313	2.777	22.492	-	0.036	0.749	8.457	0.363	0.104	96.875	4.12606	0.176317	100.825		2.75805	0.25219	1.27854	0.0814016	0.0173987	0.161018	2.32471	-	0.00267428	0.100683	0.748009	0.0795953	0.012221	1.90818	93.5223	-0.62258
52	Chromitite	39.788	4.74	15.629	1.461	0.319	3.148	22.356	-	0.027	0.947	8.202	0.388	0.084	96.915	4.11774	0.18233	100.85		2.75959	0.247324	1.27753	0.0801148	0.0177386	0.182595	2.31148	-	0.00200643	0.127344	0.725716	0.0851076	0.00987433	1.90502	92.6789	-1.15284
55	Chromitite	40.079	4.023	15.778	1.518	0.285	2.613	22.795	0.029	0.125	0.384	9.398	0.407	0.055	97.306	4.12537	0.183787	101.248		2.77383	0.209463	1.28695	0.0830623	0.015814	0.151239	2.35183	0.00169996	0.00926914	0.0515265	0.829759	0.0890842	0.0064515	1.90446	93.9579	-0.257098
55	Chromitite	39.641	4.051	15.398	1.577	0.278	2.829	22.294	-	0.128	0.221	9.376	0.307	0.057	96.021	4.11235	0.142131	99.9912		2.782	0.21388	1.27357	0.0875011	0.015642	0.166037	2.3324	-	0.00962474	0.0300706	0.839428	0.0681388	0.00677989	1.92508	93.3544	-0.654156
55	Chromitite	39.105	3.833	15.282	1.535	0.262	2.819	22.041	-	0.07	0.357	9.171	0.502	0.058	94.811	3.96169	0.224466	98.5482		2.78211	0.205152	1.28136	0.0863417	0.0149444	0.167725	2.33764	-	0.0053359	0.0492434	0.832363	0.112951	0.00699368	1.88006	93.3053	-0.654499
56	Chromitite	39.497	4.572	15.425	1.391	0.331	2.706	22.473	-	0.044	0.405	9.268	0.426	0.074	96.427	4.06726	0.196075	100.298		2.76177	0.240505	1.27115	0.0768988	0.0185561	0.158238	2.34254	-	0.00329642	0.0549054	0.826729	0.0942056	0.00876981	1.89702	93.6724	-0.543112
56	Chromitite	38.392	4.548	14.852	1.628	0.302	3.034	21.104	-	0.043	0.47	8.732	0.355	0.121	93.425	3.95129	0.176784	97.1995		2.77357	0.24718	1.26453	0.092987	0.017492	0.183305	2.27283	-	0.00332839	0.0658314	0.804759	0.0811092	0.0148156	1.90408	92.5368	-1.23583
56	Chromitite	39.749	4.709	15.249	1.963	0.306	2.556	22.866	-	0.048	0.34	9.354	0.468	0.059	97.462	4.09201	0.210375	101.344		2.75316	0.245374	1.24478	0.107497	0.0169927	0.148056	2.36102	-	0.00356216	0.0456585	0.826526	0.102517	0.00692616	1.89056	94.0992	-0.408589
66	Chromitite	39.493	3.858	15.864	1.622	0.28	2.765	22.751	0.024	-	0.357	9.532	0.207	0.036	96.701	4.19338	0.0952852	100.799		2.75338	0.20235	1.30349	0.0894059	0.0156509	0.161214	2.36456	0.00141722	-	0.048256	0.847781	0.0456415	0.00425387	1.9501	93.6172	-0.486949
66	Chromitite	39.541	3.688	15.922	1.644	0.261	2.7	23.112	-	0.04	0.401	9.406	0.294	0.041	96.917	4.16196	0.133047	100.946		2.74963	0.192936	1.30488	0.0903853	0.0145513	0.157019	2.39589	-	0.00298026	0.054064	0.834421	0.0646573	0.00483221	1.93051	93.8494	-0.352657
66	Chromitite	39.896	3.756	15.903	1.366	0.275	2.45	23.164	0.024	0.049	0.328	9.5	0.353	0.028	96.937	4.14693	0.154956	100.929		2.76813	0.196055	1.30042	0.0749338	0.0152977	0.142162	2.39593	0.00141042	0.00364267	0.0441233	0.840881	0.0774597	0.00329269	1.91925	94.3989	0.0433007
68	Chromitite	39.944	3.471	15.854	1.448	0.252	2.75	22.754	-	0.073	0.331	9.466	0.328	0.036	96.565	4.13712	0.146235	100.556		2.78411	0.182005	1.30233	0.0797944	0.0140822	0.160298	2.36426	-	0.0054516	0.0447301	0.841695	0.0723023	0.00425278	1.92344	93.6505	-0.354578
68	Chromitite	39.917	3.572	15.862	1.566	0.261	2.588	22.824	0.024	0.08	0.344	9.374	0.322	0.039	96.628	4.14493	0.144385	100.629		2.77853	0.187052	1.30125	0.0861823	0.0145657	0.150655	2.36838	0.00141497	0.00596642	0.046425	0.832407	0.0708853	0.00460105	1.92451	94.0194	-0.14994
68	Chromitite	39.42	3.678	16.012	1.836	0.269	2.802	23.137	0.021	0.042	0.319	9.486	0.296	0.041	97.225	4.16792	0.133889	101.259		2.73683	0.192105	1.31016	0.10078	0.0149733	0.16269	2.39465	0.00123489	0.00312426	0.0429397	0.840172	0.0649931	0.00482448	1.93018	93.6383	-0.513783
69.5	Chromitite	39.949	4.805	15.813	1.435	0.348	3.064	22.328	-	0.028	0.927	8.239	0.203	0.182	97.208	4.19818	0.126547	101.28		2.75951	0.249698	1.28732	0.0783695	0.0192726	0.177001	2.29921	-	0.00207229	0.124149	0.726029	0.0443472	0.0213075	1.93435	92.8519	-1.0025
69.5	Chromitite	39.646	4.809	15.742	1.428	0.351	3.072	22.631	0.027	0.022	0.778	8.59	0.268	0.183	97.393	4.16201	0.154142	101.401		2.7418	0.250199	1.28305	0.0780789	0.0194616	0.177672	2.33315	0.00158153	0.00163014	0.104316	0.75785	0.0586158	0.0214498	1.91993	92.9238	-1.04965
69.5	Chromitite	40.101	4.263	15.979	1.475	0.296	2.863	22.745	-	0.068	0.802	8.425	0.284	0.177	97.318	4.16785	0.159525	101.326		2.76567	0.221185	1.2988	0.0804279	0.0163671	0.165131	2.33849	-	0.00502483	0.10724	0.741258	0.0619452	0.0206897	1.91737	93.4043	-0.588664
69.5	Chromitite	39.826	4.122	15.926	1.497	0.276	2.966	22.833	-	0.081	0.768	8.44	0.323	0.185	97.065	4.12972	0.177752	101.017		2.75788	0.214739	1.29976	0.0819595	0.0153233	0.171767	2.35708	-	0.0060098	0.103111	0.745597	0.0707382	0.0217128	1.90755	93.2077	-0.740558
71	Chromitite	39.905	4.739	15.315	1.473	0.341	2.927	22.453	-	0.055	0.653	8.738	0.283	0.227	96.957	4.125	0.170387	100.912		2.77167	0.247626	1.25366	0.0808885	0.0189891	0.170019	2.32484	-	0.00409302	0.0879356	0.774248	0.0621648	0.0267224	1.91111	93.1852	-0.881362
71	Chromitite	39.646	5.065	15.108	1.343	0.347	3.086	22.318	0.034	0.029	0.579	9.125	0.339	0.242	97.063	4.08243	0.197352	100.948		2.76149	0.265411	1.24022	0.0739588	0.019378	0.179763	2.31741	0.00200587	0.00216426	0.0781916	0.810832	0.0746772	0.028569	1.89675	92.8013	-1.22391
71	Chromitite	39.68	4.736	15.269	1.519	0.336	3.03	22.339	0.021	-	0.636	8.85	0.294	0.217	96.757	4.10681	0.172762	100.691		2.76599	0.248362	1.2544	0.0837155	0.0187782	0.176637	2.32138	0.00123987	-	0.0859553	0.787002	0.0648141	0.0256374	1.90955	92.9289	-1.06433
71	Chromitite	39.586	4.849	15.519	1.522	0.348	2.989	22.378	-	0.024	0.691	8.725	0.188	0.228	96.931	4.1667	0.130611	100.967		2.75148	0.253555	1.27127	0.0836391	0.0193928	0.173745	2.31873	-	0.00178733	0.0931195	0.77365	0.0413264	0.0268594	1.93181	93.0292	-0.990708
71	Chromitite	39.688	4.755	15.316	1.082	0.34	2.429	22.126	0.032	0.012	0.675	8.901	0.3	0.229	95.707	4.07048	0.177996	99.5995		2.78626	0.251136	1.26723	0.0600564	0.0191371	0.14261	2.31563	0.00190279	0.000902632	0.0918763	0.797178	0.0666082	0.0272479	1.90614	94.1987	-0.130032
71	Chromitite	39.425	4.901	15.032	1.188	0.331	2.579	22.067	0.023	-	0.668	8.655	0.195	0.221	95.155	4.09945	0.131979	99.1225		2.78268	0.260238	1.25042	0.0662945	0.0187307	0.152231	2.32187	0.00137499	-	0.0914124	0.779314	0.0435281	0.0264374	1.93003	93.847	-0.430744
71	Chromitite	38.975	4.642	15.427	0.686	0.323	1.757	22.106	-	0.034	0.653	8.699	0.301	0.237	93.663	3.99621	0.180223	97.479		2.78297	0.249357	1.29823	0.0387272	0.018491	0.104919	2.35308	-	0.00260117	0.0904008	0.792401	0.0679724	0.0286818	1.90335	95.7315	0.923355
75	Chromitite	39.953	4.858	15.041	1.675	0.328	2.822	22.628	-	0.039	0.35	9.323	0.292	0.108	97.283	4.15767	0.147323	101.293		2.77071	0.253451	1.22932	0.0918387	0.0182369	0.163666	2.33933	-	0.00289783	0.0470594	0.824804	0.0640424	0.0126941	1.92326	93.4612	-0.808763
75	Chromitite	39.985	4.523	14.991	1.452	0.316	2.734	22.416	-	0.081	0.301	9.418	0.3	0.113	96.489	4.12152	0.15182	100.459		2.79301	0.237682	1.23411	0.0801884	0.0176969	0.159711	2.33419	-	0.00606216	0.0407642	0.839243	0.0662736	0.0133779	1.92035	93.5959	-0.613995
75	Chromitite	39.666	4.331	15.117	1.57	0.31	2.751	22.9	-	0.056	0.437	9.306	0.382	0.125	96.78	4.08515	0.189056	100.676		2.76715	0.227299	1.24287	0.086593	0.0173385	0.160496	2.38151	-	0.0041857	0.0591061	0.828191	0.0842793	0.0147795	1.90094	93.6862	-0.625428
75	Chromitite	39.587	4.386	15.118	1.608	0.28	2.732	22.367	0.039	0.133	0.37	9.212	0.24	0.113	96.058	4.131	0.126556	100.062		2.77748	0.231506	1.25009	0.0891977	0.0157504	0.160302	2.33943	0.00231762	0.00999809	0.0503312	0.824529	0.0532541	0.0134373	1.93331	93.5872	-0.618008
93	Chromitite	39.357	4.351	15.161	1.398	0.3	2.865	22.425	-	0.023	0.689	8.776	0.29	0.134	95.627	4.08628	0.152348	99.5609		2.77151	0.230504	1.25826	0.0778344	0.0169376	0.168725	2.35413	-	0.00173536	0.09407	0.788397	0.0645857	0.0159932	1.91942	93.3121	-0.784376
93	Chromitite	40.2	4.706	14.737	1.509	0.308	2.854	22.661	-	0.011	0.627	8.763	0.227	0.14	96.618	4.16552	0.127175	100.656		2.79744	0.246366	1.20862	0.0830219	0.0171838	0.166092	2.3508	-	0.00082015	0.0845938	0.77793	0.0499578	0.0165119	1.93353	93.4009	-0.822903
93	Chromitite	39.708	4.6	15.236	1.494	0.316	2.928	22.598	-	-	0.683	8.832	0.191	0.142	96.62	4.17627	0.112468	100.684		2.76693	0.241142	1.25123	0.0823077	0.017654	0.170629	2.34744	-	-	0.0922737	0.785115	0.0420918	0.0167704	1.94114	93.2238	-0.886757
93	Chromitite	39.621	4.682	15.187	1.515	0.295	2.692	22.372	-	0.062	0.602	8.873	0.203	0.116	96.114	4.15926	0.111653	100.162		2.77242	0.246468	1.25243	0.0838139	0.0165497	0.157533	2.33369	-	0.00464828	0.0816709	0.79206	0.0449235	0.0137571	1.94132	93.6765	-0.571842
94.5	Chromitite	39.061	4.371	15.766	1.552	0.322	2.917	22.757	-	0.065	0.829	8.105	0.139	0.285	96.046	4.14675	0.122841	100.07		2.73318	0.230092	1.30015	0.0858591	0.0180641	0.170696	2.3738	-	0.0048731	0.112465	0.723489	0.0307598	0.0337991	1.93544	93.2916	-0.784335
94.5	Chromitite	40.053	4.685	15.201	1.725	0.296	2.757	22.966	-	-	0.756	8.473	0.212	0.283	97.256	4.16459	0.153128	101.267		2.76903	0.243667	1.23854	0.0942867	0.0164066	0.159401	2.3669	-	-	0.101333	0.747279	0.0463523	0.0331599	1.92049	93.6904	-0.632211
94.5	Chromitite	39.61	4.701	15.434	1.487	0.345	2.819	22.957	0.031	0.008	0.753	8.501	0.251	0.282	97.009	4.13035	0.169324	100.97		2.74854	0.245405	1.26219	0.081579	0.0191934	0.163589	2.37474	0.00182196	0.000594778	0.101305	0.752526	0.0550827	0.0331652	1.91175	93.5553	-0.706048
94.5	Chromitite	40.178	4.48	15.401	1.452	0.326	2.824	22.776	0.023	0.028	0.795	8.346	0.249	0.267	96.98	4.14524	0.165097	100.96		2.78144	0.233321	1.25654	0.0794725	0.018094	0.163496	2.35051	0.00134861	0.00207685	0.106705	0.737077	0.054516	0.0313276	1.91416	93.4966	-0.634976
96	Chromitite	39.774	4.189	15.605	1.574	0.295	2.761	22.871	-	0.05	0.538	8.987	0.247	0.097	96.862	4.17507	0.125893	100.911		2.7626	0.218889	1.27741	0.0864356	0.0164276	0.160378	2.36814	-	0.00372096	0.0724499	0.796318	0.0542574	0.0114189	1.93432	93.6572	-0.526742
96	Chromitite	39.377	4.206	15.24	1.727	0.306	2.453	22.807	-	0.016	0.541	9.032	0.225	0.087	95.902	4.14506	0.114373	99.9327		2.76253	0.221987	1.26008	0.0957912	0.0172116	0.14392	2.38526	-	0.00120268	0.0735865	0.808354	0.0499218	0.0103447	1.93973	94.3096	-0.180487
96	Chromitite	39.984	4.018	15.353	1.972	0.289	2.718	23.111	-	0.035	0.589	8.758	0.277	0.09	97.076	4.17372	0.136946	101.113		2.77006	0.209415	1.25356	0.108014	0.0160522	0.157476	2.38685	-	0.00259799	0.0791144	0.774037	0.0606913	0.0105677	1.92874	93.8107	-0.493569
102	Chromitite	38.658	4.363	15.207	1.364	0.297	2.687	22.123	-	0.039	0.848	8.153	0.284	0.283	94.125	3.99202	0.183445	97.9336		2.7607	0.234402	1.27989	0.077013	0.0170048	0.160476	2.3552	-	0.00298409	0.117412	0.742765	0.064142	0.0342533	1.9016	93.621	-0.54651
102	Chromitite	39.123	4.362	15.347	1.75	0.308	2.836	22.828	0.047	0.025	0.753	8.5	0.385	0.297	96.332	4.18562	0.229132	100.288		2.74099	0.229909	1.2672	0.0969354	0.0173006	0.166166	2.38422	0.00278902	0.00187664	0.102284	0.75971	0.0358285	0.00811138	1.95606	93.4847	-0.76129
102	Chromitite	38.996	4.515	15.472	1.534	0.303	3.012	22.566	-	0.01	0.862	8.303	0.244	0.268	95.94	4.0858	0.163217	99.8626		2.73853	0.238534	1.28053	0.085171	0.0170598	0.176894	2.36241	-	0.000752426	0.117366	0.743851	0.0541914	0.0318983	1.91391	93.0338	-1.00451
102	Chromitite	38.955	4.294	15.428	1.331	0.288	2.894	22.335	-	0.021	0.934	7.987	0.35	0.299	94.902	3.99143	0.214846	98.6786		2.75906	0.2288	1.28782	0.0745325	0.0163541	0.171419	2.35824	-	0.00159362	0.128257	0.721665	0.0783989	0.0358926	1.88571	93.2236	-0.772808
102	Chromitite	38.387	4.439	15.09	1.541	0.337	2.763	22.414	-	0.011	0.858	8.328	0.47	0.296	94.688	3.90668	0.264697	98.33		2.73734	0.238136	1.26818	0.0868793	0.0192668	0.164773	2.38269	-	0.000840435	0.118623	0.757598	0.105995	0.0357743	1.85823	93.5319	-0.741715
102	Chromitite	38.428	4.055	14.956	1.754	0.267	2.568	22.161	0.031	0.076	0.784	7.966	0.323	0.265	93.438	3.94807	0.195805	97.1903		2.76405	0.219424	1.26783	0.0997462	0.0153973	0.154473	2.37624	0.00188859	0.00585704	0.109333	0.730956	0.0734757	0.0323057	1.89422	93.8961	-0.40734
103	Chromitite	38.828	4.143	15.352	1.534	0.298	2.947	22.529	-	0.01	0.625	8.904	0.357	0.156	95.498	4.03111	0.185525	99.3436		2.74575	0.220407	1.27946	0.0857651	0.0168953	0.174284	2.37499	-	0.000757674	0.0856905	0.803257	0.0798413	0.0186972	1.90146	93.1634	-0.897858
103	Chromitite	40.084	4.308	15.826	1.56	0.291	3.085	22.952	-	-	0.452	7.836	0.495	0.16	96.828	4.06082	0.244535	100.644		2.77171	0.224103	1.28972	0.0852847	0.0161326	0.178399	2.36592	-	-	0.0605972	0.691234	0.108249	0.0187513	1.873	92.9883	-0.864249
Karee (phlogopite abundance: 0.10–0.86 vol.%; n=7)
Drill core 4049
65	Chromitite	39.957	4.22	15.781	1.619	0.33	3.155	22.129	-	-	0.851	8.475	0.293	0.239	96.883	4.11652	0.177305	100.822		2.77573	0.220542	1.29201	0.0889203	0.0183795	0.183293	2.29166	-	-	0.114618	0.751066	0.0643718	0.0281396	1.90749	92.5941	-1.07769
65	Chromitite	39.491	4.164	15.657	1.301	0.331	2.583	22.619	0.029	0.106	0.714	8.089	0.151	0.229	95.348	4.1425	0.115257	99.3752		2.77154	0.219851	1.29503	0.0721888	0.0186246	0.151603	2.36647	0.00172385	0.00797069	0.0971535	0.724222	0.0335154	0.0272392	1.93925	93.9794	-0.223451
65	Chromitite	39.757	4	15.637	1.474	0.339	2.906	22.479	-	0.09	0.757	8.376	0.154	0.228	96.081	4.16066	0.116294	100.125		2.77764	0.210241	1.28755	0.0814197	0.0189888	0.169793	2.34123	-	0.00673709	0.102541	0.74654	0.0340273	0.0269981	1.93897	93.2381	-0.690316
65	Chromitite	39.2	3.721	15.621	1.716	0.296	3.032	22.676	-	0.068	0.781	8.269	0.288	0.229	95.735	4.06997	0.172944	99.632		2.756	0.196811	1.29435	0.0953851	0.0166848	0.178272	2.37664	-	0.00512235	0.106459	0.741653	0.0640369	0.0272876	1.90868	93.0224	-0.887455
65	Chromitite	39.957	3.904	15.974	1.47	0.298	3.012	22.539	-	0.079	0.697	8.249	0.245	0.221	96.492	4.14176	0.153032	100.481		2.77707	0.204127	1.30845	0.0807758	0.0166053	0.17507	2.33525	-	0.00588286	0.0939214	0.731391	0.0538523	0.0260329	1.92011	93.026	-0.742677
65	Chromitite	40.07	4.069	15.7	1.504	0.321	3.067	22.683	-	0.021	0.792	8.605	0.23	0.228	97.155	4.16308	0.148296	101.17		2.77465	0.211968	1.28125	0.082339	0.0178208	0.177608	2.34149	-	0.00155802	0.106329	0.760139	0.0503686	0.0267583	1.92287	92.9495	-0.908128
65	Chromitite	39.569	3.952	15.392	1.561	0.301	2.92	22.258	-	0.202	0.88	8.195	0.212	0.215	95.531	4.109	0.137783	99.5022		2.78232	0.209056	1.27554	0.0867808	0.0169689	0.17171	2.33314	-	0.0152184	0.11997	0.735113	0.0471445	0.0256227	1.92723	93.1449	-0.776798
65	Chromitite	39.94	3.967	15.689	1.575	0.3	2.953	22.4	-	0.029	0.935	8.501	0.235	0.244	96.626	4.13454	0.154012	100.607		2.77984	0.207715	1.28693	0.0866685	0.0167405	0.171884	2.32414	-	0.0021626	0.126171	0.754806	0.0517277	0.028783	1.91949	93.1137	-0.760141
65	Chromitite	40.368	4.05	15.81	1.463	0.328	2.915	22.767	-	0.03	0.838	8.377	0.249	0.224	97.263	4.17192	0.155394	101.28		2.78446	0.210162	1.28523	0.0797842	0.0181389	0.168152	2.34106	-	0.00221713	0.112069	0.737132	0.0543183	0.026187	1.91949	93.2986	-0.63489
65	Chromitite	39.82	3.957	15.394	1.512	0.331	2.648	22.888	-	0.014	0.866	8.535	0.148	0.203	96.208	4.17495	0.108127	100.275		2.77875	0.207735	1.26604	0.0834198	0.0185187	0.154535	2.381	-	0.00104675	0.117166	0.75981	0.0326628	0.0240093	1.94333	93.9052	-0.352844
65	Chromitite	39.172	4.036	15.529	1.557	0.32	3.043	22.359	0.054	0.111	0.722	8.346	0.206	0.226	95.543	4.10161	0.137739	99.5069		2.75921	0.213873	1.28914	0.0867095	0.0180715	0.179255	2.34782	0.00322167	0.0083772	0.0986014	0.749965	0.0458902	0.0269807	1.92713	92.9066	-0.965942
65	Chromitite	39.925	4.207	15.721	1.451	0.325	2.889	22.383	0.037	0.045	0.753	8.426	0.174	0.252	96.458	4.16159	0.130132	100.489		2.77869	0.220274	1.28951	0.0798422	0.0181348	0.168153	2.32229	0.0021811	0.00335564	0.101608	0.748119	0.0382991	0.0297256	1.93198	93.2481	-0.670164
80	Chromitite	39.193	3.564	15.421	1.258	0.276	2.504	22.748	0.043	0.287	0.856	7.992	-	0.156	94.266	4.18549	0.0377287	98.4138		2.77945	0.190144	1.28887	0.0705343	0.0156926	0.148507	2.4049	0.00258284	0.0218072	0.117696	0.723035	-	0.0187504	1.9799	94.184	-0.0929214
80	Chromitite	38.473	3.906	15.68	1.6	0.308	2.736	22.25	0.026	0.186	0.849	8.217	-	0.159	94.366	4.16289	0.0443007	98.4846		2.73824	0.209142	1.31525	0.0900335	0.0175752	0.162852	2.36074	0.00156735	0.0141839	0.117155	0.746074	-	0.0191799	1.97632	93.5468	-0.54382
80	Chromitite	38.579	3.922	15.346	1.511	0.304	2.972	22.182	0.043	0.105	0.797	8.134	0.102	0.179	94.093	4.10409	0.0833416	98.1137		2.75549	0.210742	1.29178	0.085326	0.0174083	0.177524	2.36185	0.00260133	0.00803533	0.110368	0.741149	0.0230405	0.0216688	1.95529	93.0091	-0.906775
80	Chromitite	38.848	3.753	15.95	1.545	0.301	3.05	22.603	-	0.062	0.889	8.103	-	0.134	95.208	4.22025	0.0302379	99.398		2.73794	0.198989	1.32484	0.08609	0.0170081	0.179769	2.37478	-	0.0046818	0.121477	0.728541	-	0.0160064	1.98399	92.9628	-0.875923
80	Chromitite	39.003	3.75	15.885	1.442	0.295	2.914	22.515	0.051	0.115	0.876	8.089	-	0.142	95.045	4.21535	0.0320431	99.2283		2.75072	0.198964	1.32033	0.0804049	0.0166803	0.171869	2.36714	0.00304647	0.00868985	0.119781	0.727774	-	0.0169735	1.98303	93.2308	-0.675053
80	Chromitite	39.231	3.588	15.761	1.371	0.302	2.635	22.839	-	0.131	0.856	8.252	0.128	0.135	95.145	4.16258	0.0843606	99.2232		2.7628	0.190094	1.30813	0.0763356	0.0170515	0.155189	2.39773	-	0.00988459	0.116878	0.741367	0.0285085	0.0161135	1.95538	93.9211	-0.247143
80	Chromitite	39.043	3.751	15.82	1.469	0.292	2.775	22.338	-	0.142	0.856	8.243	0.253	0.136	94.988	4.08837	0.13722	98.9391		2.75909	0.199418	1.31758	0.0820755	0.016544	0.164001	2.35326	-	0.0107517	0.117282	0.743124	0.056544	0.0162891	1.92717	93.4849	-0.493102
98	Chromitite	39.459	4.786	15.508	1.749	0.371	3.251	21.557	-	0.047	0.584	8.663	0.167	0.189	96.221	4.15375	0.112968	100.262		2.76368	0.25218	1.28011	0.0968505	0.020833	0.190423	2.25079	-	0.00352701	0.0793035	0.774042	0.0369916	0.0224357	1.94057	92.1996	-1.42257
98	Chromitite	40.019	4.566	15.859	1.585	0.329	3.24	22.023	-	0.01	0.617	8.972	0.214	0.205	97.506	4.18299	0.136369	101.553		2.76698	0.237504	1.2923	0.0866439	0.0182377	0.187346	2.26997	-	0.000740809	0.0827107	0.791375	0.0467947	0.0240231	1.92918	92.376	-1.24717
98	Chromitite	39.21	4.382	15.71	1.812	0.317	3.157	21.884	-	0.09	0.594	8.551	0.237	0.196	95.998	4.10933	0.144022	99.9633		2.75232	0.231403	1.29965	0.100561	0.0178401	0.185327	2.28998	-	0.0067688	0.0808399	0.765725	0.0526131	0.0233181	1.92407	92.513	-1.19381
98	Chromitite	39.826	4.409	15.781	1.73	0.335	3.407	21.719	0.027	0.012	0.557	8.986	0.103	0.206	97.009	4.21025	0.0898554	101.129		2.76967	0.230673	1.29343	0.0951211	0.0186785	0.19815	2.25167	0.00159039	0.000894148	0.0751024	0.797226	0.0226539	0.0242809	1.95307	91.9116	-1.51993
98	Chromitite	39.688	4.424	15.69	1.688	0.358	3.307	21.786	0.02	0.026	0.611	8.797	0.14	0.218	96.645	4.17659	0.108143	100.713		2.76846	0.232161	1.28988	0.0930939	0.0200215	0.192919	2.26548	0.00118165	0.00194321	0.0826338	0.782831	0.0308853	0.0257734	1.94334	92.1527	-1.39081
98	Chromitite	39.414	4.326	15.478	1.731	0.334	3.338	21.576	0.039	0.025	0.527	8.658	0.225	0.199	95.73	4.1005	0.139646	99.6909		2.77558	0.229184	1.28459	0.0963762	0.0188575	0.196585	2.26505	0.0023262	0.0018863	0.0719533	0.777812	0.0501106	0.0237515	1.92614	92.014	-1.46993
98	Chromitite	39.304	4.393	15.069	1.487	0.335	3.384	21.193	-	0.033	0.663	8.984	0.217	0.222	95.162	4.06216	0.141468	99.0827		2.79163	0.234735	1.2614	0.0835029	0.0190766	0.201008	2.24397	-	0.00251132	0.0913002	0.814038	0.0487444	0.0267245	1.92453	91.7788	-1.64656
98	Chromitite	39.126	4.512	15.632	1.737	0.362	3.325	21.581	-	0.019	0.69	8.85	0.288	0.206	96.161	4.07579	0.167753	100.069		2.75082	0.238649	1.29526	0.096553	0.0204052	0.195501	2.26189	-	0.00143125	0.0940551	0.793768	0.0640372	0.024547	1.91142	92.0444	-1.51148
98	Chromitite	40.415	4.423	15.868	1.651	0.328	3.238	21.754	-	0.029	0.601	8.889	0.243	0.211	97.511	4.17387	0.149934	101.535		2.7904	0.229739	1.2912	0.0901239	0.0181565	0.186965	2.23906	-	0.0021453	0.0804516	0.782943	0.0530607	0.0246911	1.92225	92.2933	-1.20057
98	Chromitite	39.515	4.126	15.846	1.589	0.326	3.004	22.212	-	0.06	0.812	8.448	0.13	0.191	96.161	4.17999	0.0978395	100.243		2.76167	0.216937	1.3052	0.0878017	0.0182668	0.175578	2.3142	-	0.00449291	0.110028	0.753212	0.028734	0.0226245	1.94864	92.948	-0.862327
98	Chromitite	39.301	4.241	15.703	1.644	0.3	3.03	22.267	-	0.067	0.766	8.61	0.269	0.187	96.249	4.10726	0.155466	100.201		2.75174	0.223392	1.29579	0.0910071	0.0168407	0.177422	2.32418	-	0.00502627	0.103985	0.769061	0.0595662	0.0221912	1.91824	92.9077	-0.966624
98	Chromitite	40.037	4.16	16.025	1.52	0.327	3.157	22.391	-	0.018	0.787	8.621	0.133	0.2	97.275	4.22444	0.101134	101.398		2.76709	0.216297	1.30529	0.0830566	0.0181194	0.182472	2.30695	-	0.00133291	0.105456	0.760103	0.0290708	0.0234275	1.9475	92.6701	-1.01313
98	Chromitite	39.687	4.064	15.702	1.677	0.319	3.39	21.83	-	0.034	0.761	8.101	0.122	0.2	95.792	4.16917	0.0965018	99.8647		2.78168	0.214293	1.29707	0.0929313	0.0179261	0.19871	2.28095	-	0.00255332	0.103414	0.724356	0.0270435	0.0237588	1.9492	91.9864	-1.41019
114	Chromitite	39.821	3.32	15.557	1.412	0.25	2.848	22.999	0.03	0.088	0.998	7.638	0.137	0.164	95.167	4.16578	0.0946942	99.2381		2.79462	0.175284	1.28672	0.0783455	0.0140665	0.167152	2.40615	0.00178324	0.00661697	0.135793	0.683822	0.030407	0.0195069	1.95009	93.5044	-0.470036
114	Chromitite	39.219	3.742	15.843	1.63	0.27	3.137	22.146	0.024	0.096	0.815	7.847	0.175	0.174	95.005	4.12202	0.112951	99.0141		2.7674	0.198643	1.31753	0.0909353	0.0152747	0.185119	2.32956	0.00143438	0.00725794	0.111499	0.706371	0.0390532	0.0208094	1.94014	92.6385	-0.985479
114	Chromitite	38.667	4.414	15.16	1.46	0.314	3.086	21.945	0.025	0.129	0.634	8.449	-	0.177	94.42	4.16207	0.0399411	98.5421		2.75579	0.236664	1.27336	0.0822674	0.017942	0.183934	2.33155	0.00150912	0.00985058	0.0876056	0.768183	-	0.0213803	1.97862	92.6879	-1.18142
114	Chromitite	38.862	4.54	15.593	1.474	0.318	2.918	21.827	-	0.084	0.682	8.487	-	0.172	94.922	4.19209	0.0388128	99.0753		2.75089	0.241768	1.30084	0.0824925	0.0180472	0.17274	2.30327	-	0.00637079	0.0935985	0.7664	-	0.0206353	1.97936	93.0234	-0.874876
114	Chromitite	38.627	4.561	15.426	1.556	0.336	2.974	22.13	-	0.053	0.734	8.666	0.108	0.148	95.25	4.14752	0.0788727	99.3186		2.73391	0.242856	1.28675	0.0870707	0.0190663	0.176033	2.33495	-	0.00401917	0.100722	0.782466	0.0241747	0.0177538	1.95807	92.9895	-1.0252
114	Chromitite	39.108	4.317	15.622	1.58	0.317	2.969	21.77	-	0.036	0.685	8.652	0.119	0.158	95.267	4.14905	0.085761	99.3303		2.7619	0.229361	1.30025	0.0882203	0.0179488	0.175353	2.29194	-	0.00272403	0.0937928	0.779493	0.0265786	0.0189119	1.95451	92.8929	-0.913411
114	Chromitite	38.195	4.423	15.32	1.745	0.334	3.032	21.48	-	0.044	0.658	8.727	0.194	0.173	94.209	4.04572	0.120726	98.134		2.73867	0.238587	1.29461	0.0989234	0.0192006	0.181813	2.296	-	0.00338029	0.0914738	0.798275	0.0439926	0.021024	1.93498	92.6624	-1.17833
114	Chromitite	39.104	4.238	15.789	1.512	0.324	2.948	22.196	-	0.043	0.694	8.71	0.229	0.163	95.817	4.11607	0.133207	99.7999		2.74838	0.224085	1.30785	0.0840189	0.0182573	0.173278	2.3256	-	0.00323811	0.0945698	0.780958	0.050902	0.0194169	1.92968	93.0657	-0.832244
114	Chromitite	38.605	4.326	15.636	1.715	0.334	3.193	21.736	-	0.035	0.653	8.792	0.139	0.166	95.252	4.12132	0.0959877	99.2773		2.73683	0.23072	1.3064	0.0961253	0.0189839	0.189306	2.29714	-	0.00265851	0.0897541	0.795144	0.0311647	0.0199456	1.94889	92.3865	-1.31087
114	Chromitite	39.379	3.844	15.879	1.455	0.281	2.934	22.26	-	0.037	1.077	7.597	0.17	0.093	94.917	4.15471	0.092568	98.9791		2.77233	0.203591	1.3175	0.0809866	0.0158607	0.172744	2.3362	-	0.00279093	0.147006	0.682302	0.0378507	0.0110968	1.95105	93.1149	-0.670773
114	Chromitite	38.61	4.052	14.687	1.419	0.283	2.766	21.837	-	1.232	0.665	8.207	0.116	0.283	94.044	4.05362	0.112705	97.9849		2.76918	0.218633	1.24146	0.0804644	0.0162732	0.165907	2.33479	-	0.0946738	0.0924721	0.750914	0.026312	0.0344012	1.93929	93.3656	-0.826642
114	Chromitite	38.688	4.616	15.452	1.523	0.34	3.155	21.758	-	0.075	0.653	8.552	0.272	0.285	95.205	4.02652	0.178843	99.0527		2.74369	0.246275	1.29149	0.0853941	0.0193318	0.187119	2.30028	-	0.00569884	0.089786	0.773713	0.0610058	0.0342562	1.90474	92.4773	-1.28775
114	Chromitite	39.009	4.375	15.473	1.339	0.325	2.988	22.21	-	0.053	0.653	8.645	0.165	0.297	95.412	4.09194	0.136496	99.3674		2.75489	0.232441	1.28784	0.0747635	0.0184017	0.176474	2.33825	-	0.00401035	0.0894108	0.778858	0.0368525	0.0355493	1.9276	92.9824	-0.940027
Drill core 4048
77	Chromitite	38.579	3.31	15.983	1.744	0.246	2.768	22.501	-	0.025	0.388	9.073	-	0.096	94.707	4.18637	0.0296633	98.8637		2.74122	0.176936	1.33844	0.0979737	0.014014	0.164483	2.38341	-	0.00190327	0.0534518	0.822428	-	0.0115611	1.98417	93.5444	-0.448466
77	Chromitite	38.571	3.666	15.582	1.663	0.282	2.634	22.938	-	0.043	0.416	9.042	-	0.117	94.941	4.18833	0.0356653	99.0937		2.73501	0.195562	1.30217	0.0932307	0.0160318	0.156198	2.42469	-	0.00326688	0.057191	0.817929	-	0.0140611	1.98101	93.9479	-0.357168
77	Chromitite	38.614	2.999	15.909	1.66	0.264	2.819	22.574	-	0.105	0.376	9.094	-	0.09	94.489	4.18688	0.020309	98.6556		2.75024	0.160693	1.33542	0.0934768	0.0150753	0.167912	2.39684	-	0.00801277	0.051922	0.826295	-	0.0108644	1.98914	93.4531	-0.48473
77	Chromitite	38.395	2.948	15.886	1.669	0.249	2.937	22.403	-	0.114	0.408	8.975	0.207	0.088	94.179	4.06873	0.107019	98.1407		2.74804	0.158734	1.34002	0.0944438	0.0142884	0.175798	2.39033	-	0.00874217	0.0566168	0.819476	0.0468556	0.0106749	1.94247	93.1493	-0.663981
77	Chromitite	38.84	3.021	15.98	1.587	0.251	2.731	22.585	-	0.059	0.327	9.218	-	0.1	94.693	4.19643	0.0225656	98.8669		2.75842	0.161409	1.33753	0.0891101	0.0142919	0.162205	2.39114	-	0.00448951	0.0450262	0.835163	-	0.0120369	1.98796	93.6474	-0.325176
77	Chromitite	38.899	3.376	15.942	1.661	0.273	2.818	22.722	-	0.106	0.379	9.02	-	0.137	95.328	4.19122	0.049863	99.4694		2.74601	0.179292	1.32634	0.0927048	0.0154512	0.166366	2.39119	-	0.00801745	0.0518728	0.812313	-	0.0163915	1.97356	93.4951	-0.507603
77	Chromitite	38.242	3.552	15.799	1.522	0.243	2.742	22.622	-	0.063	0.353	9.298	0.106	0.16	94.63	4.11279	0.0807384	98.662		2.72767	0.190598	1.32809	0.0858292	0.0138961	0.163561	2.40539	-	0.00481458	0.0488161	0.846047	0.0239112	0.0193422	1.95675	93.6332	-0.484778
77	Chromitite	38.365	3.144	16.102	1.496	0.272	2.829	22.623	-	0.191	0.319	9.042	-	0.142	94.503	4.17274	0.0320431	98.6437		2.73311	0.1685	1.35192	0.0842604	0.0155355	0.168545	2.40257	-	0.0145788	0.0440606	0.821752	-	0.0171453	1.98285	93.4447	-0.493068
90	Chromitite	38.524	3.682	15.741	1.547	0.296	2.977	22.04	-	0.233	0.672	8.5	-	0.176	94.367	4.16089	0.0397154	98.4882		2.74653	0.197484	1.32261	0.0871993	0.0169192	0.177498	2.34244	-	0.0177982	0.092888	0.773083	-	0.0212668	1.97873	92.9563	-0.851394
90	Chromitite	39.164	3.884	15.682	1.503	0.296	2.882	22.239	-	0.227	0.731	8.421	0.099	0.191	95.235	4.15457	0.0847863	99.3048		2.76297	0.206141	1.30388	0.0838336	0.0167424	0.170038	2.33888	-	0.0171586	0.0999872	0.757892	0.0220886	0.022838	1.95507	93.2227	-0.693193
90	Chromitite	38.619	3.735	15.692	1.533	0.277	3.045	21.944	-	0.223	0.596	8.495	0.084	0.205	94.368	4.11246	0.0816294	98.3988		2.75412	0.200386	1.31889	0.0864356	0.0158378	0.181606	2.33292	-	0.0170393	0.0824071	0.772855	0.0189454	0.0247782	1.95628	92.7777	-0.946599
90	Chromitite	38.793	3.802	15.907	1.44	0.296	3.046	22.467	0.028	0.122	1.082	7.994	0.117	0.173	95.179	4.14823	0.0883037	99.2389		2.73833	0.201902	1.32333	0.0803645	0.0167517	0.179814	2.36418	0.00167405	0.00922697	0.14808	0.719864	0.0261193	0.0206973	1.95318	92.9318	-0.898635
90	Chromitite	38.652	3.972	15.658	1.647	0.288	3.15	21.888	0.026	0.186	0.846	8.081	0.188	0.168	94.633	4.0855	0.117071	98.6014		2.74801	0.212447	1.31199	0.0925782	0.0164162	0.187291	2.31982	0.00156566	0.0141685	0.116615	0.732933	0.0422715	0.0202437	1.93748	92.5296	-1.15313
90	Chromitite	38.907	3.48	15.502	1.259	0.256	2.824	22.56	0.046	0.191	0.884	8.091	-	0.183	94.16	4.1504	0.0543482	98.2561		2.76989	0.186385	1.30068	0.0708648	0.014612	0.168136	2.3943	0.00277378	0.0145692	0.122018	0.734838	-	0.0220812	1.97094	93.4384	-0.550061
90	Chromitite	38.668	3.385	15.704	1.598	0.258	3.003	22.103	0.04	0.147	0.885	8.049	0.147	0.111	94.011	4.10091	0.0869452	98.025		2.76126	0.181848	1.32164	0.0902198	0.014771	0.179338	2.35294	0.00241933	0.0112471	0.122528	0.733249	0.0331984	0.0134343	1.95337	92.9179	-0.822681
90	Chromitite	38.972	3.29	15.999	1.617	0.253	2.999	22.26	0.028	0.209	1.101	7.886	-	0.112	94.701	4.2084	0.0252735	98.8841		2.75799	0.175158	1.33438	0.0904729	0.0143547	0.177491	2.34838	0.00167832	0.0158472	0.151065	0.71195	-	0.0134336	1.98657	92.9731	-0.750955
90	Chromitite	39.189	3.326	15.991	1.538	0.281	3.006	22.577	-	0.275	0.909	8.092	0.19	0.109	95.39	4.14346	0.1046	99.4289		2.75747	0.176061	1.32608	0.0855602	0.0158521	0.176887	2.36819	-	0.0207322	0.124007	0.726366	0.0422808	0.0129989	1.94472	93.0498	-0.740075
90	Chromitite	39.521	3.201	16.161	1.614	0.28	2.8	23.18	-	0.233	1.088	7.847	0.161	0.114	96.106	4.19831	0.0935171	100.211		2.75346	0.167776	1.32698	0.0889044	0.0156402	0.163143	2.4075	-	0.0173929	0.146966	0.697441	0.0354748	0.0134614	1.95106	93.6536	-0.380431
90	Chromitite	39.116	4.055	15.768	1.568	0.305	3.066	22.286	-	0.125	0.673	8.711	0.213	0.133	95.907	4.13299	0.1197	99.9203		2.74812	0.214322	1.30559	0.0870958	0.0171797	0.180142	2.33409	-	0.00940932	0.0916714	0.780734	0.0473266	0.0158368	1.93684	92.8351	-0.98817
90	Chromitite	38.531	3.973	15.678	1.509	0.299	2.705	22.406	-	0.063	0.564	8.837	-	0.119	94.661	4.18989	0.026853	98.824		2.73758	0.212359	1.31279	0.0847648	0.0170319	0.160726	2.37315	-	0.00479584	0.0776914	0.800969	-	0.0143298	1.98567	93.6569	-0.48753
90	Chromitite	38.924	3.839	15.597	1.492	0.291	3.035	22.097	0.029	0.049	0.771	8.429	0.172	0.21	94.816	4.08995	0.119812	98.7861		2.76241	0.204967	1.30455	0.0837161	0.0165577	0.180132	2.3378	0.0017432	0.00372592	0.106087	0.763134	0.038605	0.0252595	1.93614	92.846	-0.928548
*Phlogopite modal abundance based on areal proportion of phlogopite identified in micro-XRF phase mapping (n=number of thin-sections mapped).
FeOT = total Fe; TotalR = recalculated total; Mg# = Mg/(Mg+Fe2+); - = below detection limit.
H2O based on (OH + F + Cl) = 2.0 in structural formula.
ΔDphlogopite-water represents D/H isotope fractionaction: = -22.4 (106T-2) + 28.2 + (2XAl - 4XMg - 68XFe), where X is the molar fraction of the cations in octahedral sites (Suzuoki-Epstein, 1979) and T = 800°C.

## Sheet: G49173
Zhou, H., et al., 2021, Contamination of the Bushveld Complex (South Africa) magmas by basinal brines: Stable isotopes in phlogopite from the UG2 chromitite: Geology, v. 49, https://doi.org/10.1130/G49173.1
